# Supplementary material for: Structural and mechanistic insights into the inhibition of type I-F CRISPR-Cas system by anti-CRISPR protein AcrIF23
Source: PubMed Central journal article supplement — J Biol Chem. 2022 Jun 10;298(7):102124. doi: 10.1016/j.jbc.2022.102124 (PMC9270243; doi:10.1016/j.jbc.2022.102124), 2022-06-10
Supplement: mmc1.pdf [file mmc1.pdf]

**Table S1 Top 10 entries of the Dali search of AcrIF23**

| No. | PDB Chain | Z score | RMSD* (Å) | Aligned residues | Molecular name                                       |
|-----|-----------|---------|-----------|------------------|------------------------------------------------------|
| 1   | 7E58-A    | 8.1     | 6.5       | 62               | Guanylate-binding protein 2                          |
| 2   | 3DO9-B    | 8.0     | 3.0       | 60               | Upf0302 protein<br>ba_1542/gbaa1542/bas1430          |
| 3   | 1F5N-A    | 7.9     | 6.0       | 60               | Interferon-induced guanylate-binding protein 1       |
| 4   | 6RZ8-A    | 7.9     | 4.1       | 66               | Cysteinyl leukotriene receptor<br>2,soluble cytochro |
| 5   | 1NG6-A    | 7.8     | 5.0       | 54               | Hypothetical protein YQEY                            |
| 6   | 5GOY-A    | 7.8     | 2.5       | 61               | Methionine--trna ligase,<br>cytoplasmic              |
| 7   | 1V7X-A    | 7.8     | 3.3       | 66               | Chitobiose phosphorylase                             |
| 8   | 1DG3-A    | 7.7     | 6.8       | 80               | Protein (interferon-induced<br>guanylate-binding pro |
| 9   | 6W1E-A    | 7.7     | 3.2       | 64               | Positive transcriptional regulator<br>mutr family    |
| 10  | 5UHQ-C    | 7.7     | 5.0       | 56               | Sugar transporter semisweet                          |

\*RMSD: root mean square deviation.

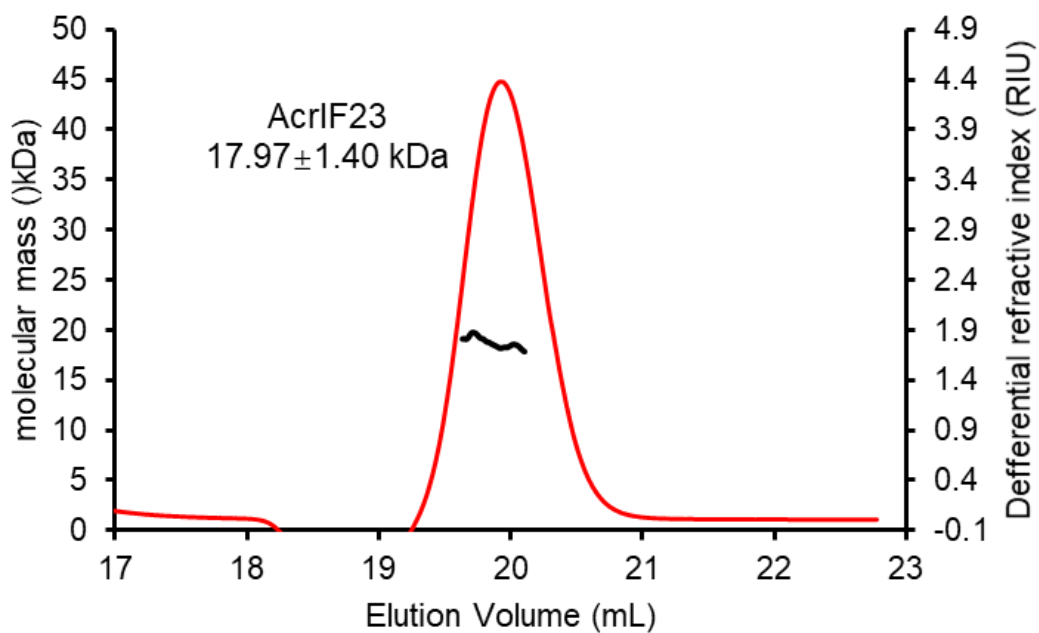

**Figure S1 AcrIF23 exists as monomer in solution.**

The average molecular weight was calculated to be  $17.97 \pm 1.40$  kDa.

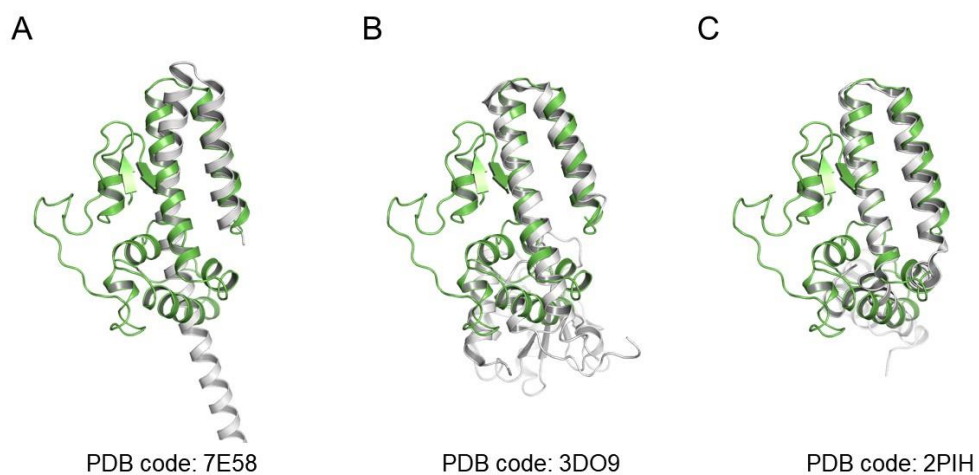

**Figure S2 Structural comparisons between AcrIF23 and the returned entries from Dali search**

(A-C) Structural superimposition between AcrIF23 and the guanylate-binding protein 2 (PDB: 7E58, A), Ba1542 from *Bacillus Anthracis Str. Ames* (PDB: 3DO9, B) and ymcA from *Bacillus subtilis* (PDB: 2PIH, C). AcrIF23 is colored in green in all the panels. All the other three structures are colored in gray.

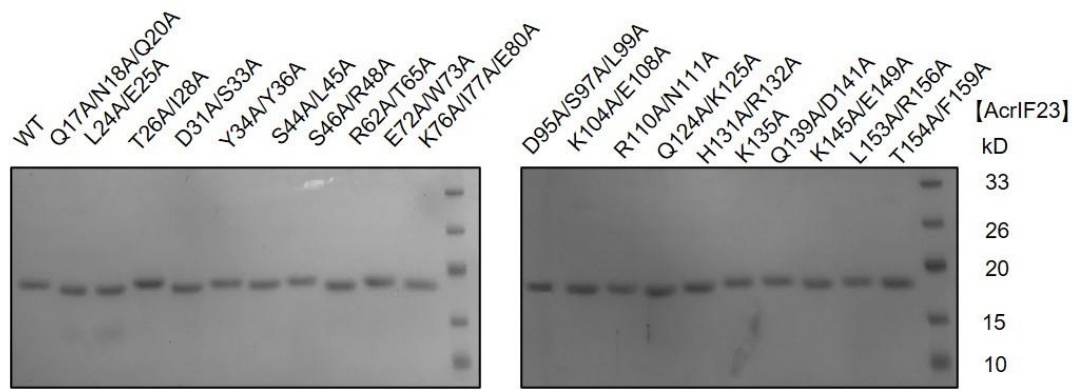

**Figure S3 The purity of AcrIF23 and its mutant proteins**  
 SDS-PAGE gel of the proteins stained by Commasie brilliant blue.

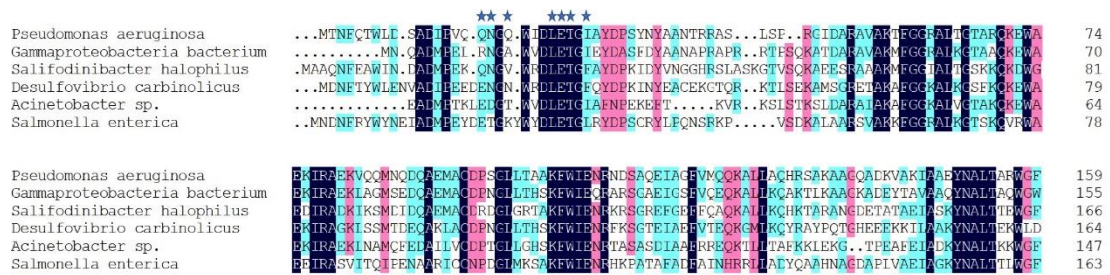

### Figure S4 Sequence alignment of AcrIF23 and its homologs

Sequence information: AcrIF23 from *Pseudomonas Aeruginosa* (WP\_052155777.1), and its homologs from *Gammaproteobacteria* (NCC41549.1), *Salifodinibacter Halophilus* (WP\_170050866.1), *Desulfovibrio Carbinolicus* (WP\_129352082.1), *Acinetobacter Sp.* (MBP9788134.1) and *Salmonella Enterica* (HAV1239868.1). Residues with 100 % identity, over 75 % identity and over 50 % identity are shaded in dark blue, pink and cyan, respectively. Residues whose mutations impairs the activity of AcrIF23 are marked with stars.
